# Supplementary material
Source: PubMed Central journal article supplement (PMC545830)

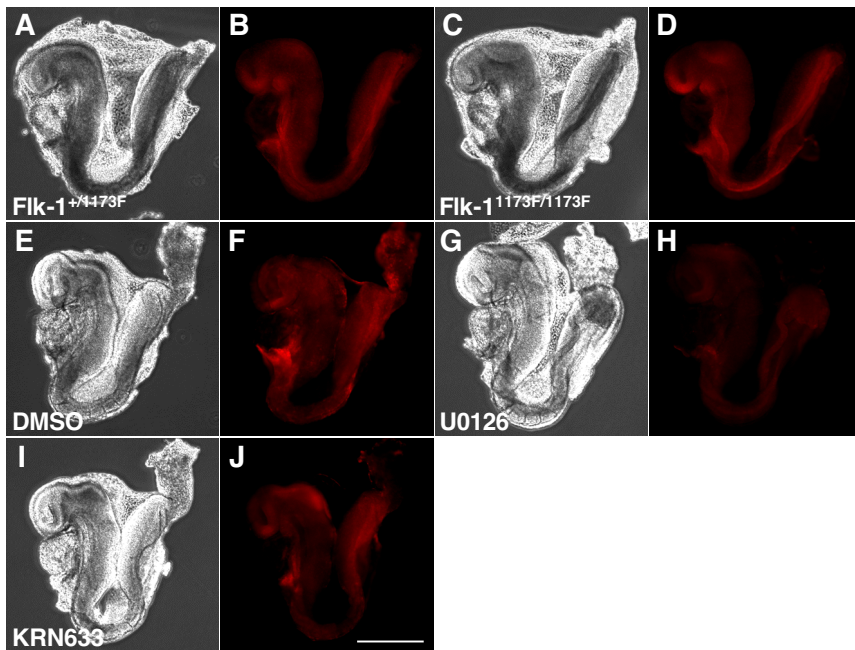

Supplement: pnas_102_4_1076__1.pdf [file pnas_102_4_1076__1.pdf]
